# Supplementary material
Source: PubMed Central journal article supplement (PMC10262920)
Supplement: NIHMS1865664-supplement-Supplemental_Figures.pdf [file NIHMS1865664-supplement-Supplemental_Figures.pdf]

# Supplemental Figure 1

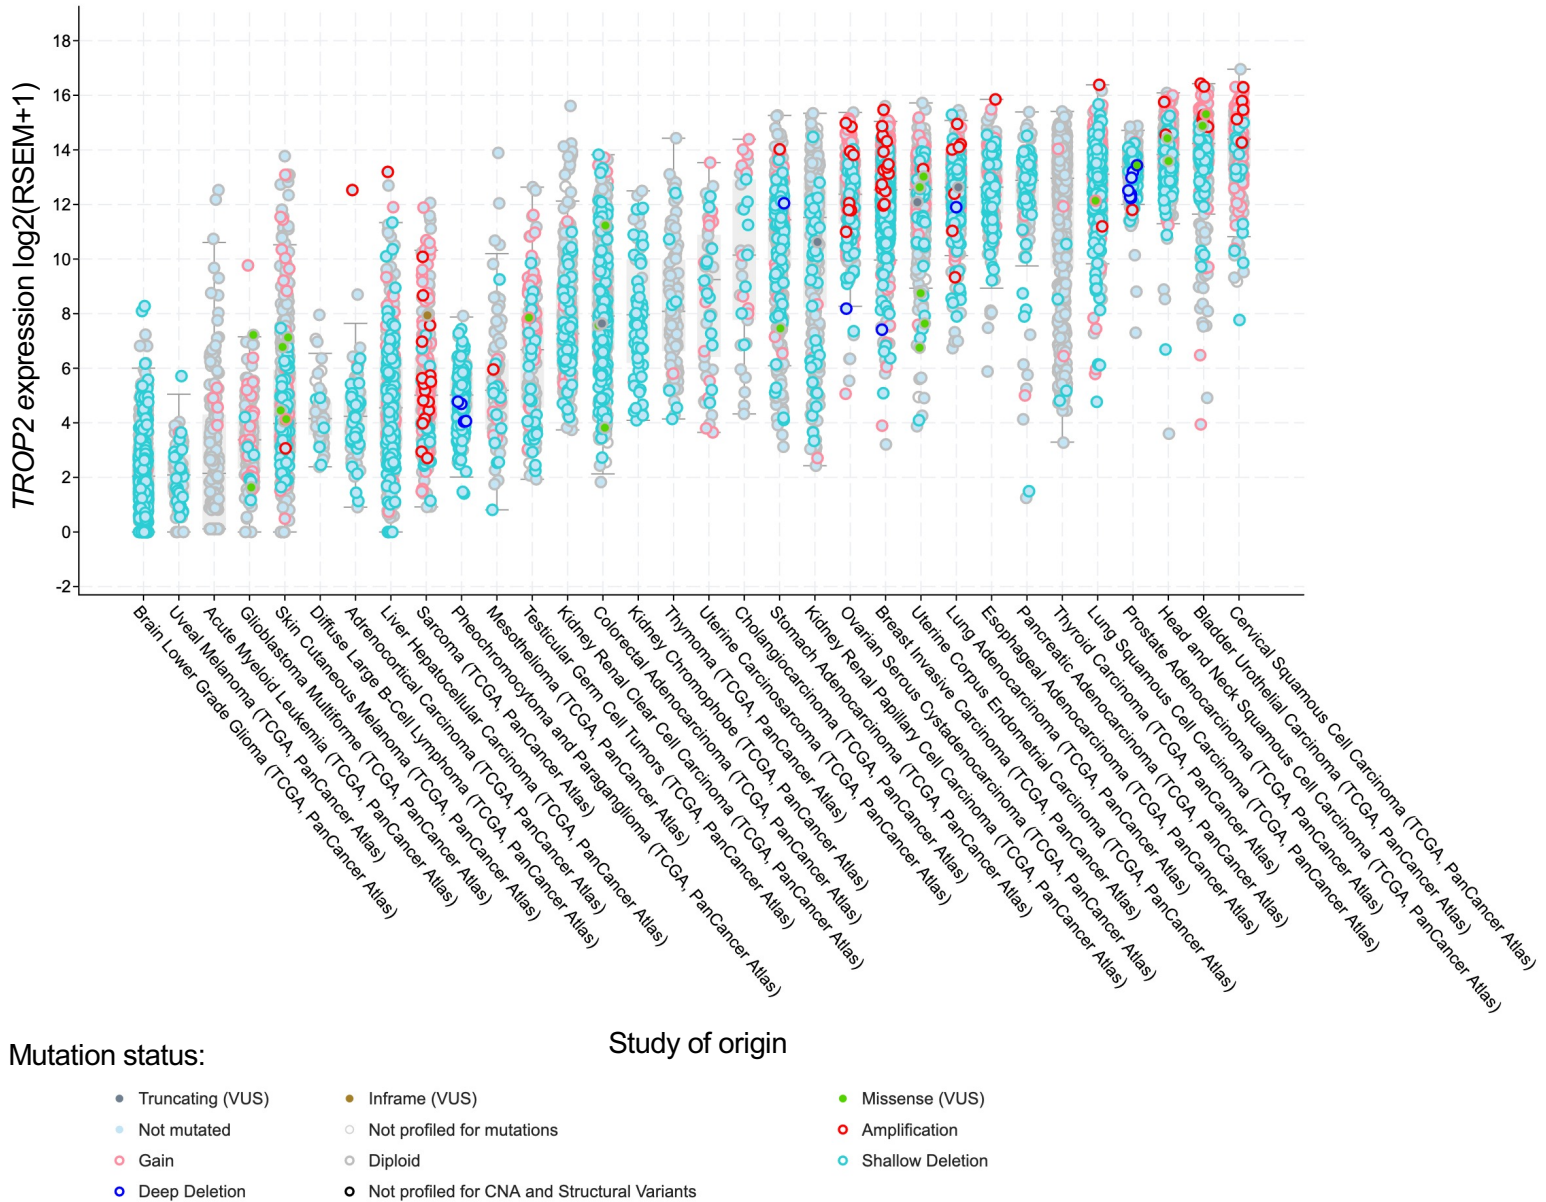

**Supplemental Figure 1. *TROP2* mRNA expression across cancer types.** *TROP2* mRNA is highly expressed across multiple types of cancer in the TCGA database, with the highest expression in urothelial and cervical squamous cell carcinomas. Datapoints are color-coded by presence and type of sequence mutations.

## Supplemental Figure 2

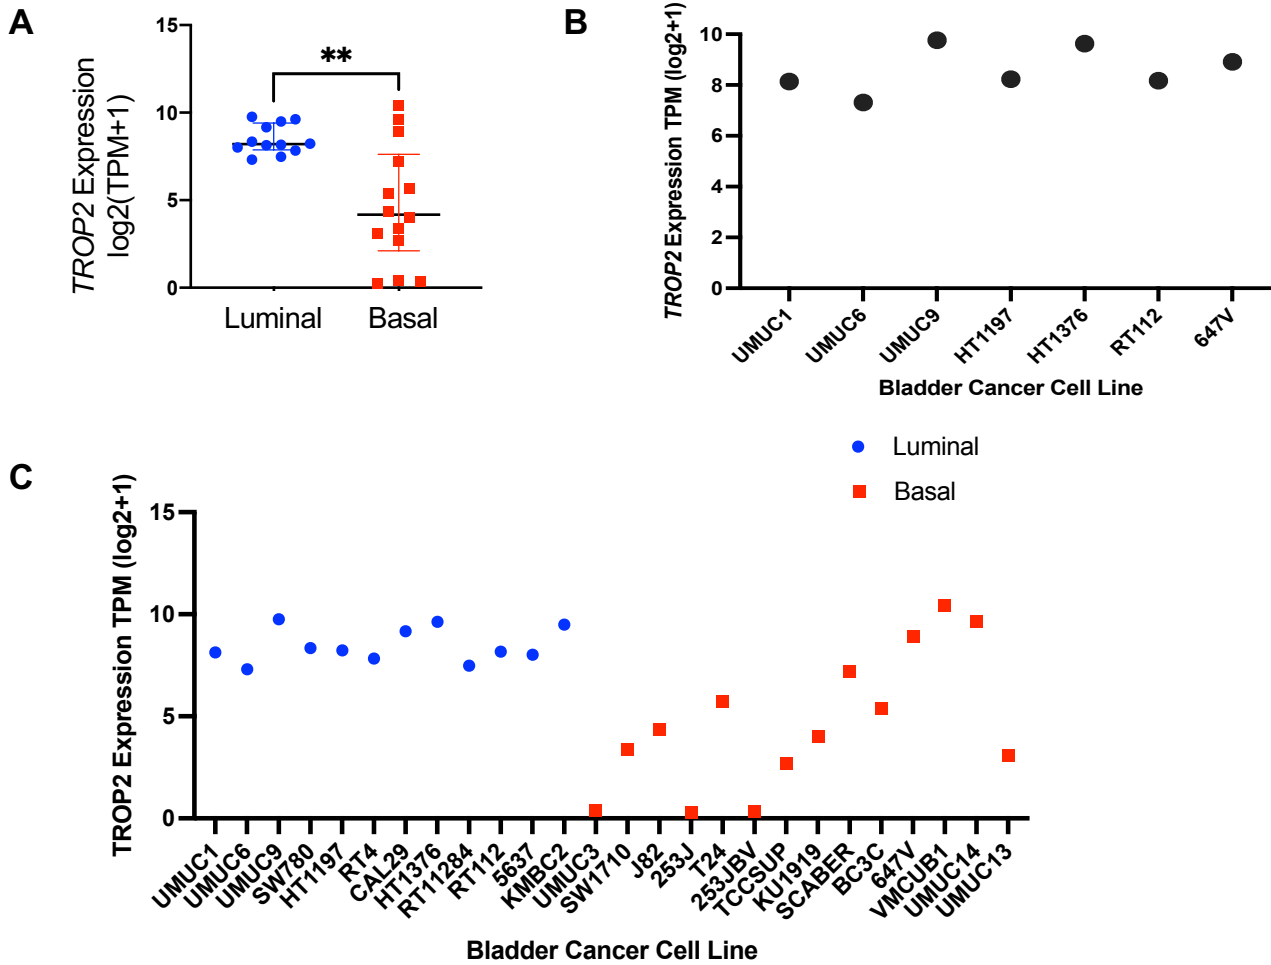

**Supplemental Figure 2. *TROP2* mRNA expression in bladder cancer cell lines.** (A) *TROP2* mRNA expression in luminal (blue dots, n=12) and basal (red squares, n=14) bladder cancer cell lines. The median and interquartile range are plotted. \*\* indicates  $p \leq 0.005$  by the Wilcoxon rank-sum test. (B) *TROP2* mRNA expression in the cell lines utilized in this study, corresponding to the surface protein expression in Fig 2E. (C) *TROP2* mRNA expression in a panel of 26 luminal and basal bladder cancer cell lines. mRNA expression data was obtained from DepMap.

## Supplemental Figure 3

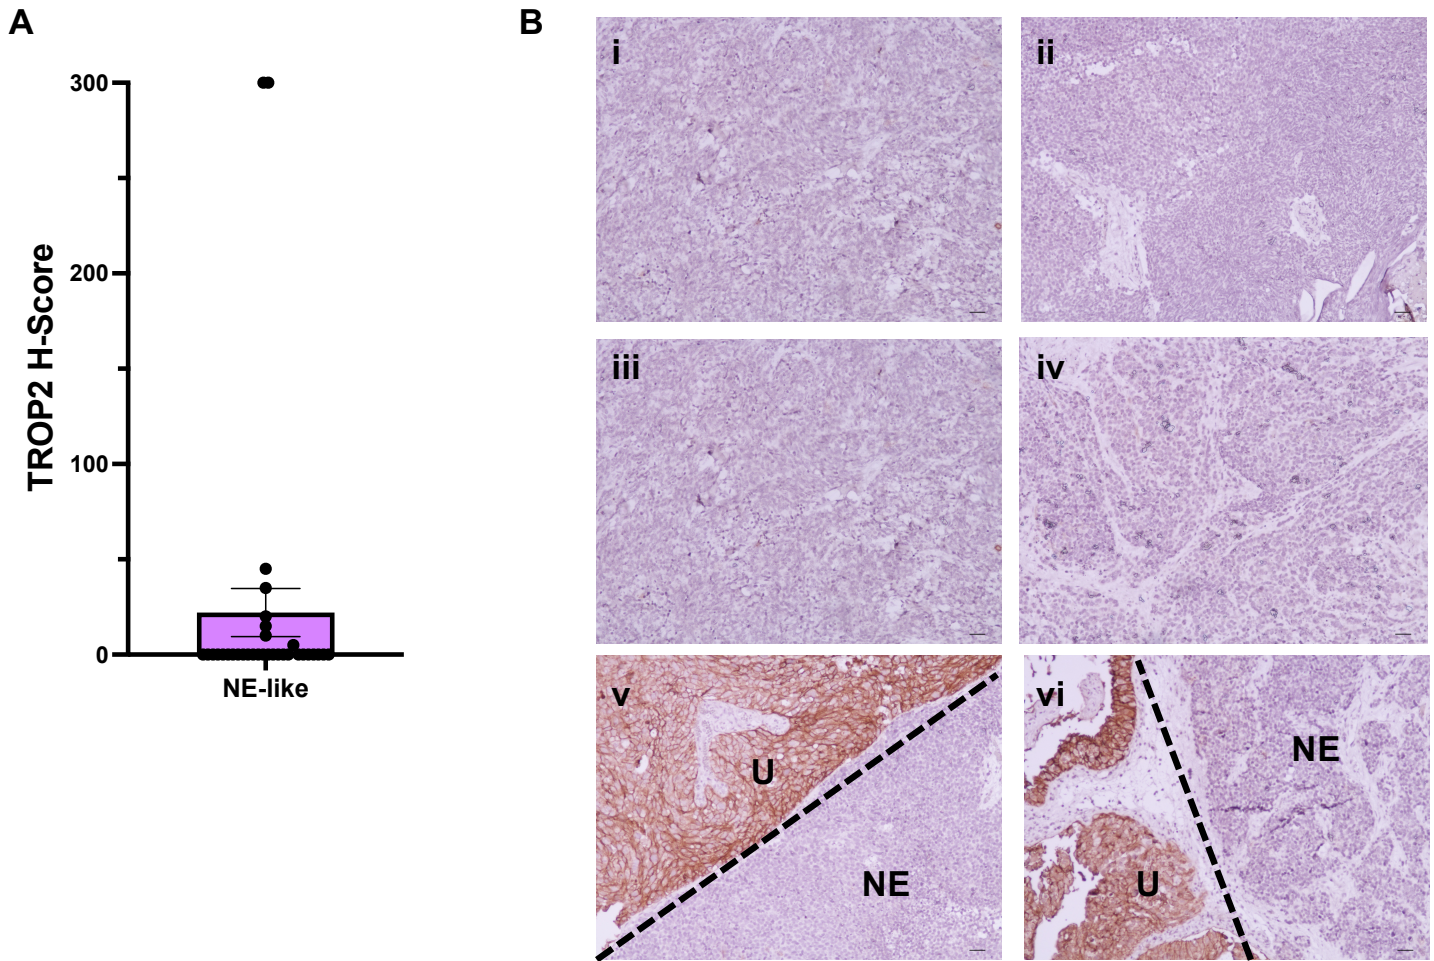

**Supplemental Figure 3: TROP2 protein expression in NE/small cell bladder cancer.** (A) TROP2 H-scores were determined by immunohistochemistry in NE/small cell bladder cancer (n=17 patient biopsies, in duplicate sections and 2 independent areas per section scored). The average TROP2 H-score  $\pm$  SEM is shown, and median H-score was 0. (B) Examples of TROP2 immunohistochemistry are shown for six tumors (i – vi). In panels v and vi, the tumors had mixed components. The urothelial component (labeled U) showed strong staining (H score = 300) for TROP2 while the neuroendocrine component (labeled NE) showed absent staining (H score = 0). The dotted line depicts the border between the urothelial and the NE/small cell areas of the tumor.

# Supplemental Figure 4

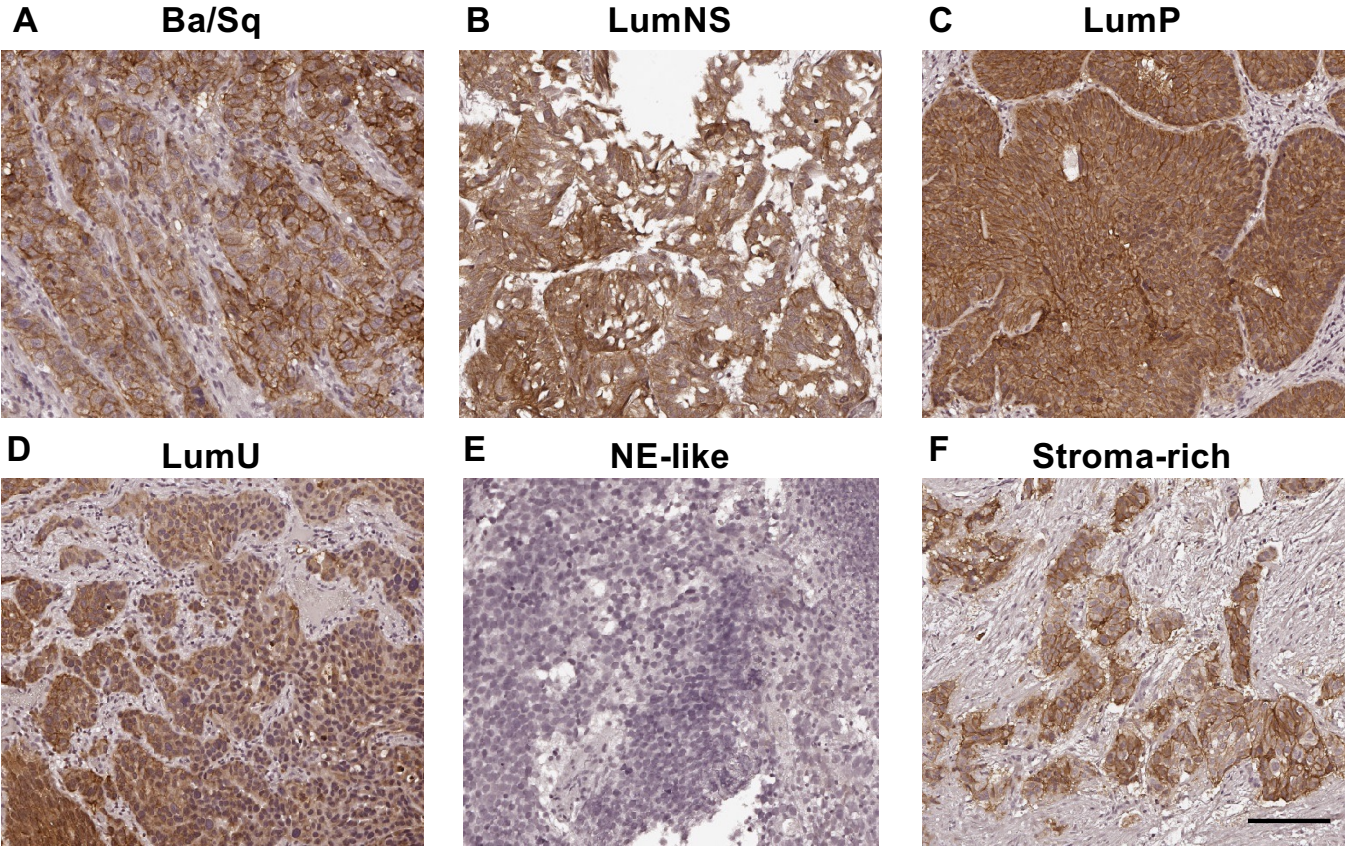

**Supplemental Figure 4: TROP2 protein expression in molecular subtypes of bladder cancer.** (A-F) Representative immunohistochemistry staining for TROP2 in the Ba/Sq (A), LumNS (B), LumP (C), LumU (D), NE-like (E) and Stroma-rich (F) bladder cancer subtypes using a bladder cancer tissue microarray (TMA). The subtypes were previously determined as described in Seiler et al, 2018. Scale bar denotes 100  $\mu\text{m}$ .

## Supplemental Figure 5

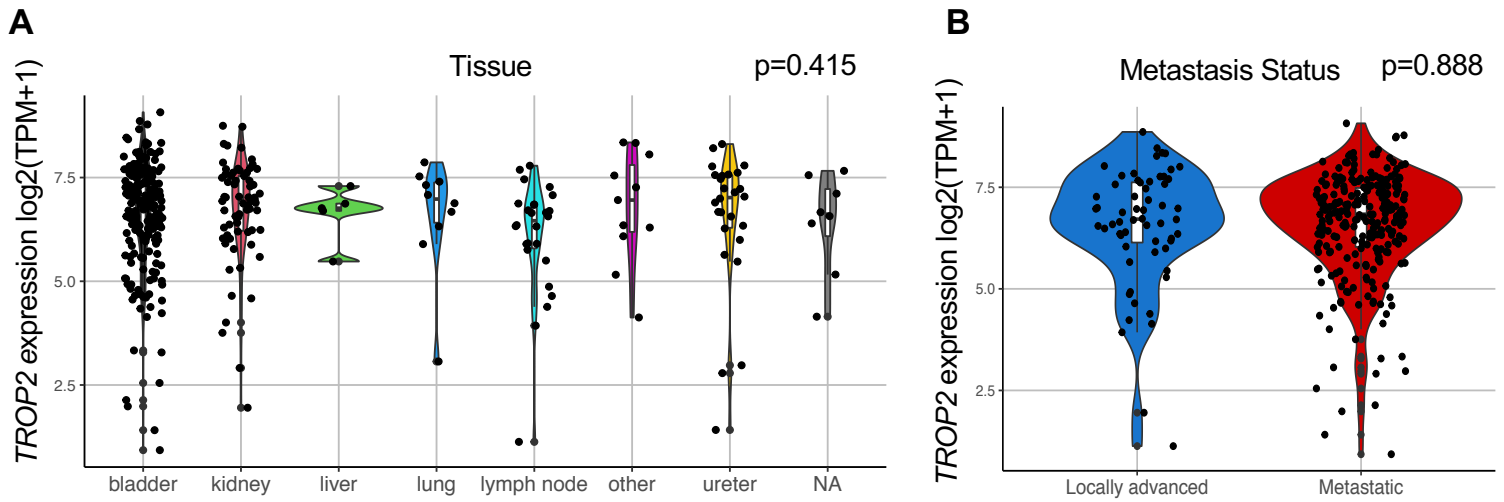

**Supplemental Figure 5: *TROP2* mRNA expression in primary and metastatic sites.** (A) *TROP2* mRNA expression levels in biopsies performed from various organs, including primary (including bladder, kidney and ureter) and metastatic sites from the IMVigor210 study. There was no difference in *TROP2* expression ( $p=0.415$  by Kruskal-Wallis test,  $n=348$  samples). (B) *TROP2* mRNA expression levels in patients with local/locally advanced and metastatic disease, from the IMVigor210 study. There was no difference in *TROP2* expression ( $p=0.888$  by Wilcoxon test).

# Supplemental Figure 6

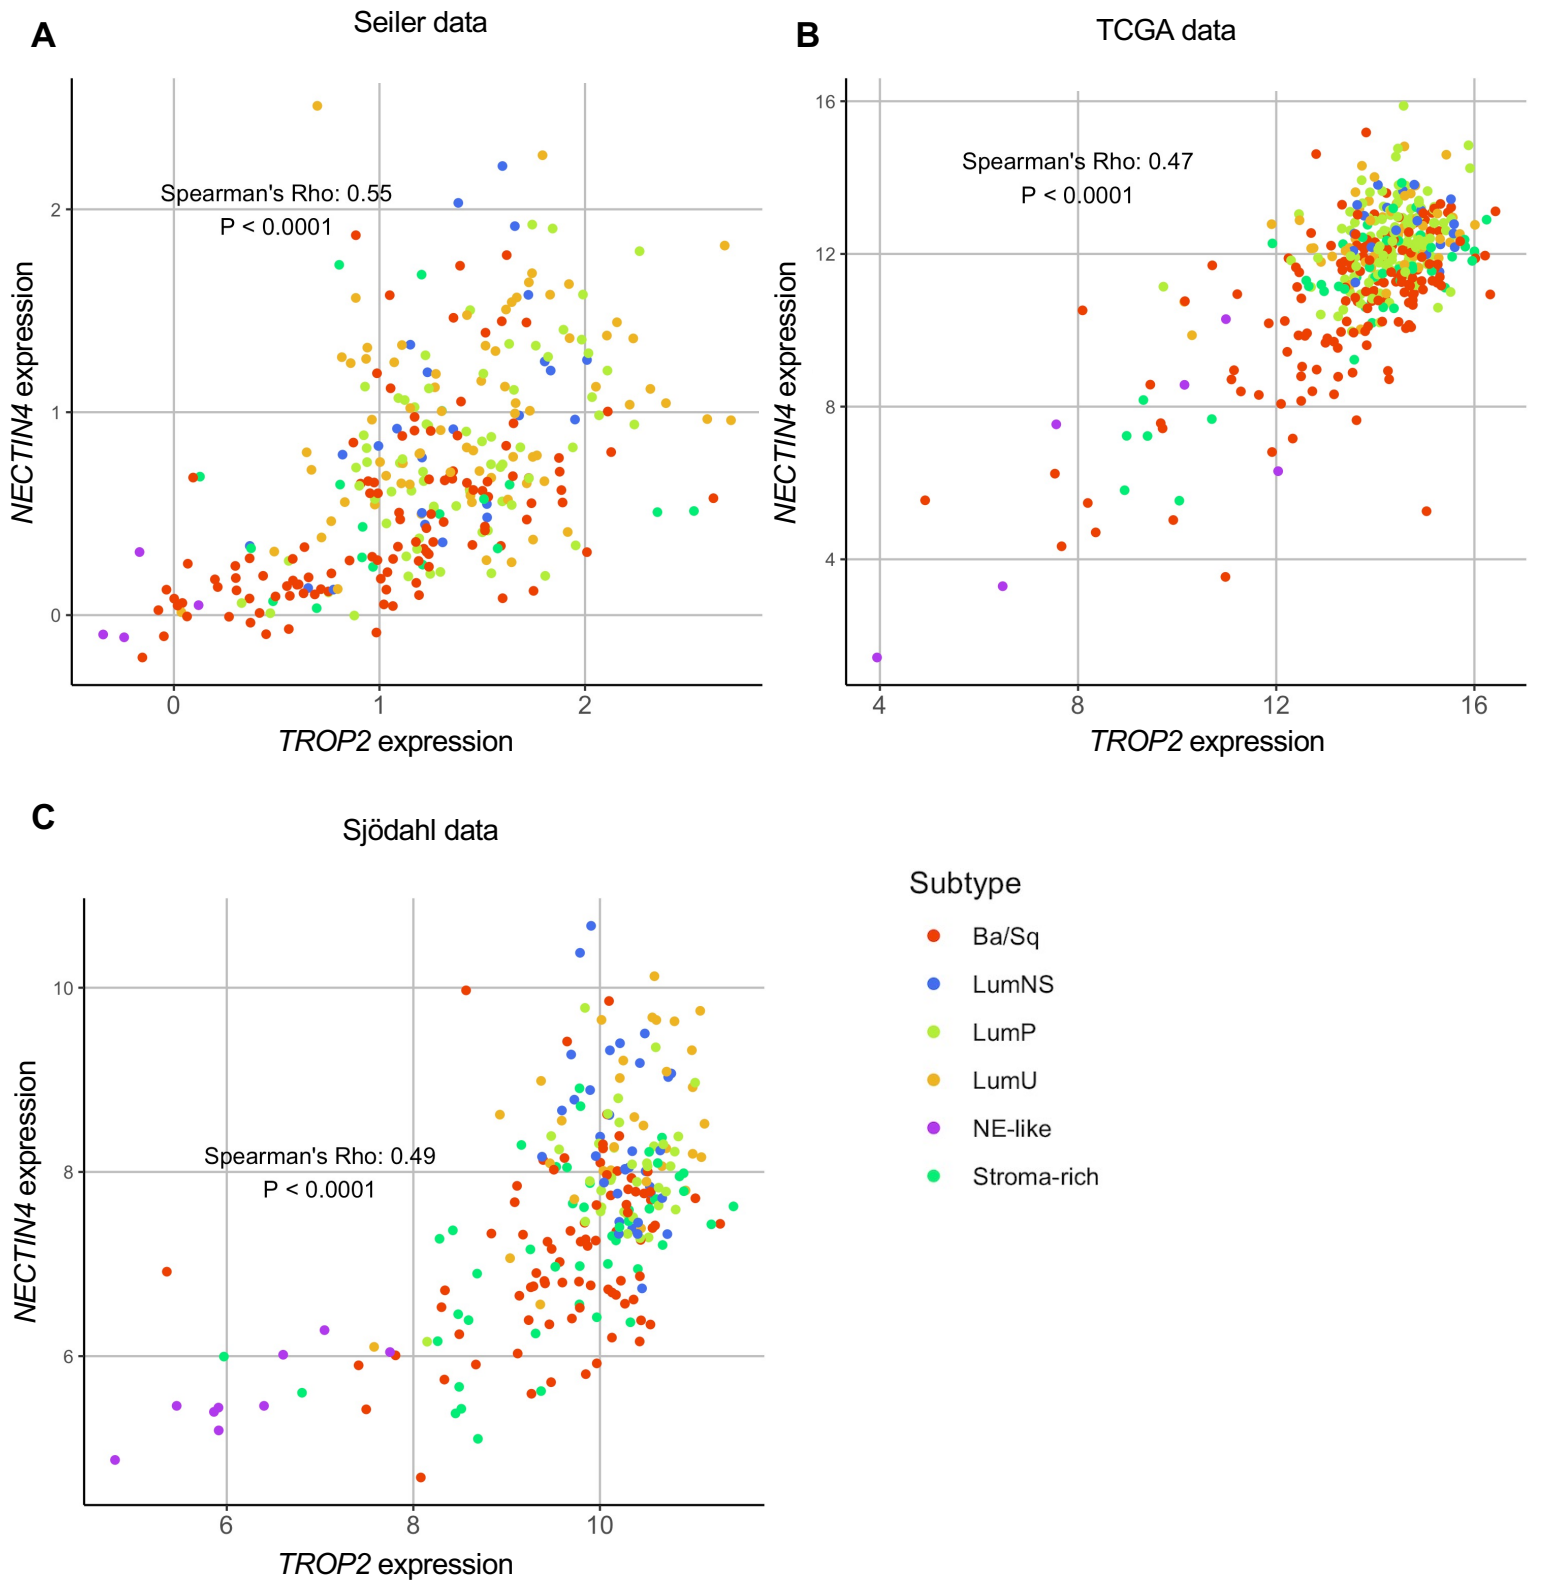

**Supplemental Figure 6. *TROP2* and *NECTIN4* mRNA expression correlation.** (A-C) Scatter plots showing correlation between *TROP2* and *NECTIN4* mRNA expression levels in the Seiler (A), TCGA (B) and Sjö Dahl (C) cohorts. The Spearman correlation coefficient and p value are shown for each cohort.

# Supplemental Figure 7

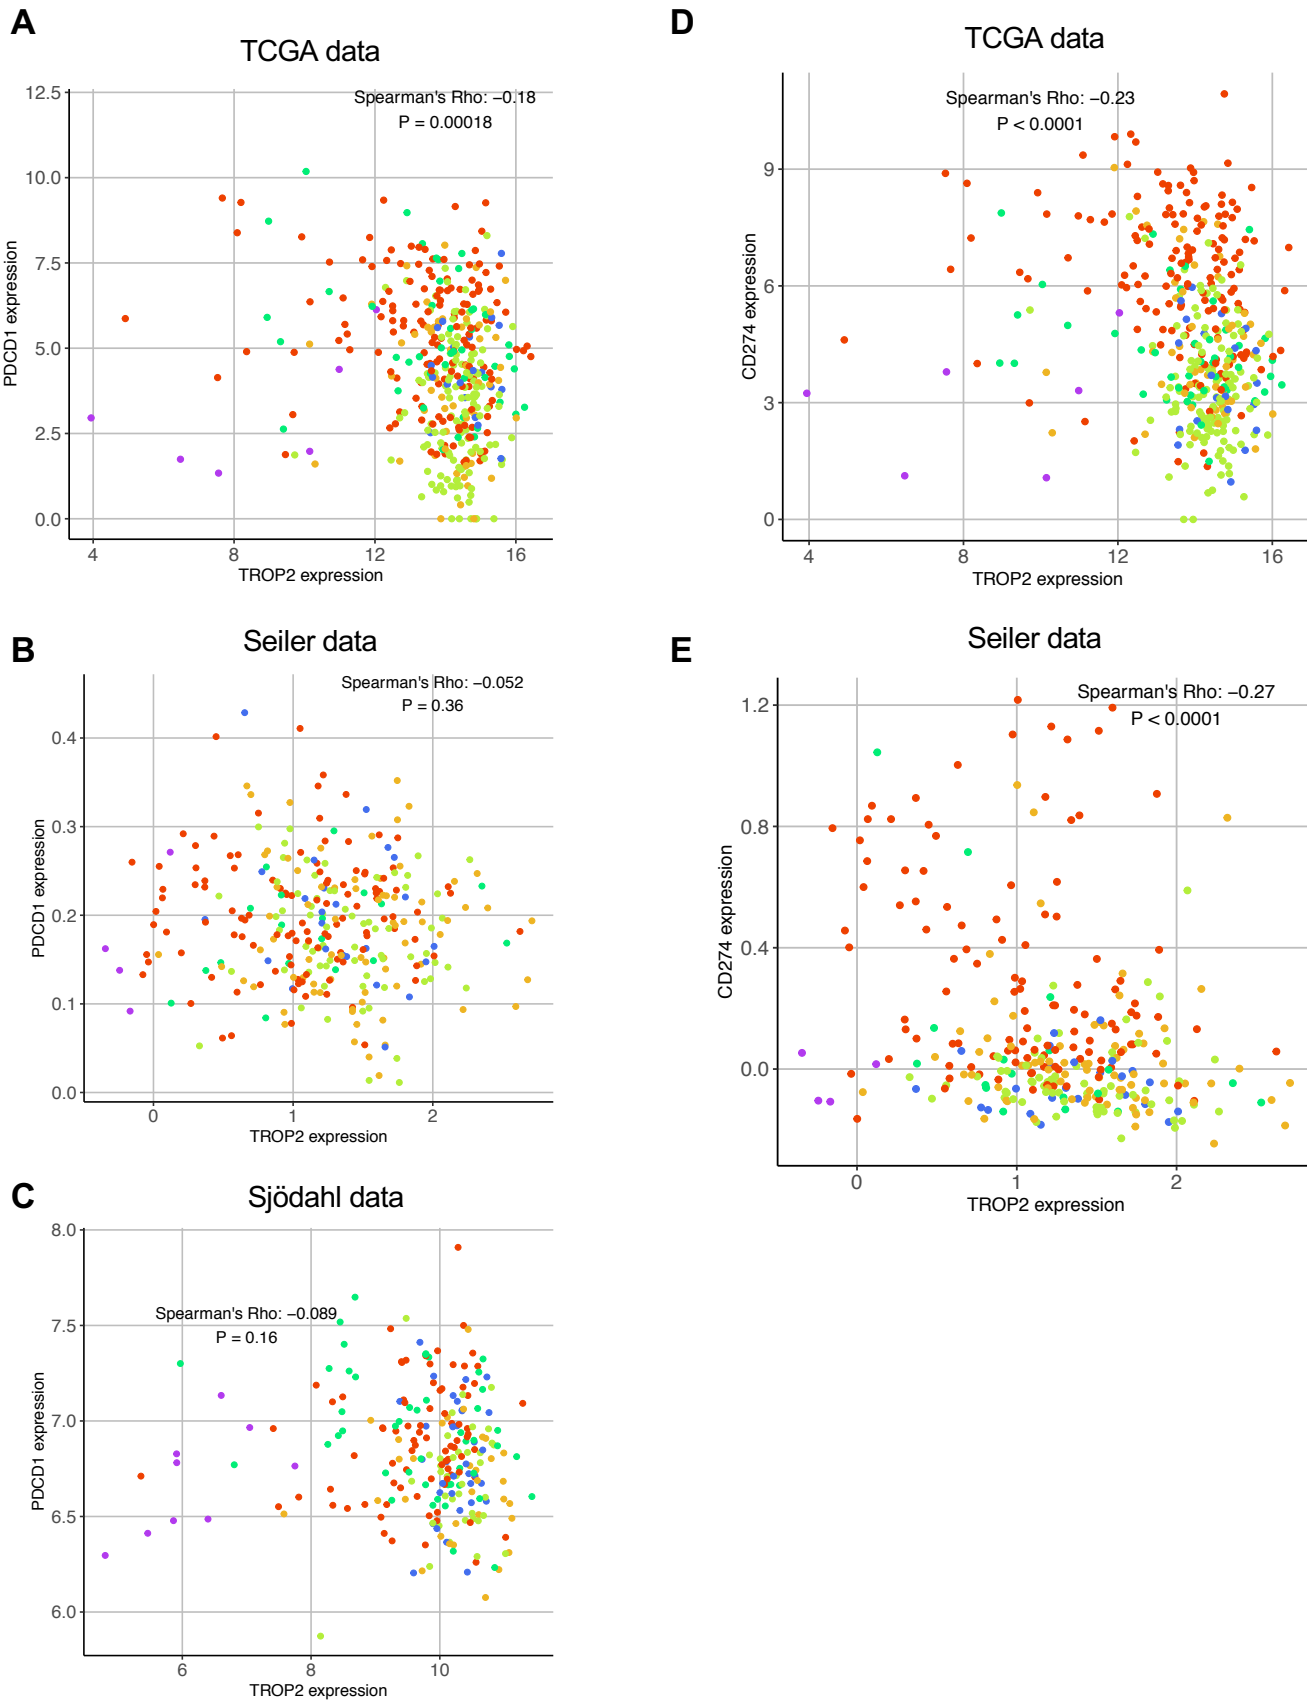

**Supplemental Figure 7: *TROP2*, *PDCD1* (*PD1*) and *CD274* (*PDL1*) mRNA expression correlation.** (A-C) Scatter plots showing correlation between *TROP2* and *PDCD1* (encoding PD1) mRNA expression levels in the TCGA (A), Seiler (B) and Sjö Dahl (C) cohorts. (D-E) Scatter plots showing correlation between *TROP2* and *CD274* (encoding PD-L1) mRNA expression levels in the TCGA (D) and Seiler (E) cohorts.

# Supplemental Figure 8

**A**

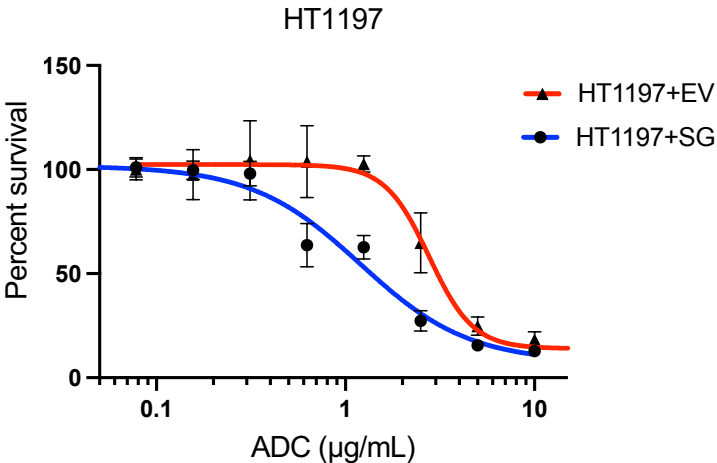

**B**

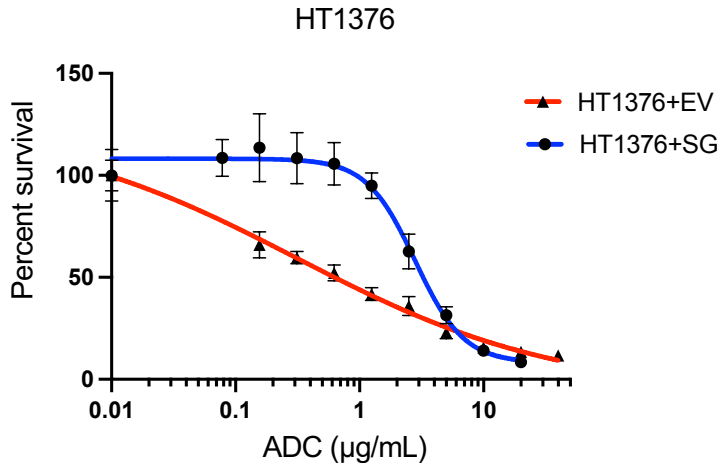

**Supplemental Figure 8. Dose response curves to the antibody drug conjugates (ADC) enfortumab vedotin (EV) and sacituzumab govitecan (SG).** Dose response curves to EV and SG in the HT-1197 (A) and HT-1376 (B) cell lines.



## Supplemental Figure 9

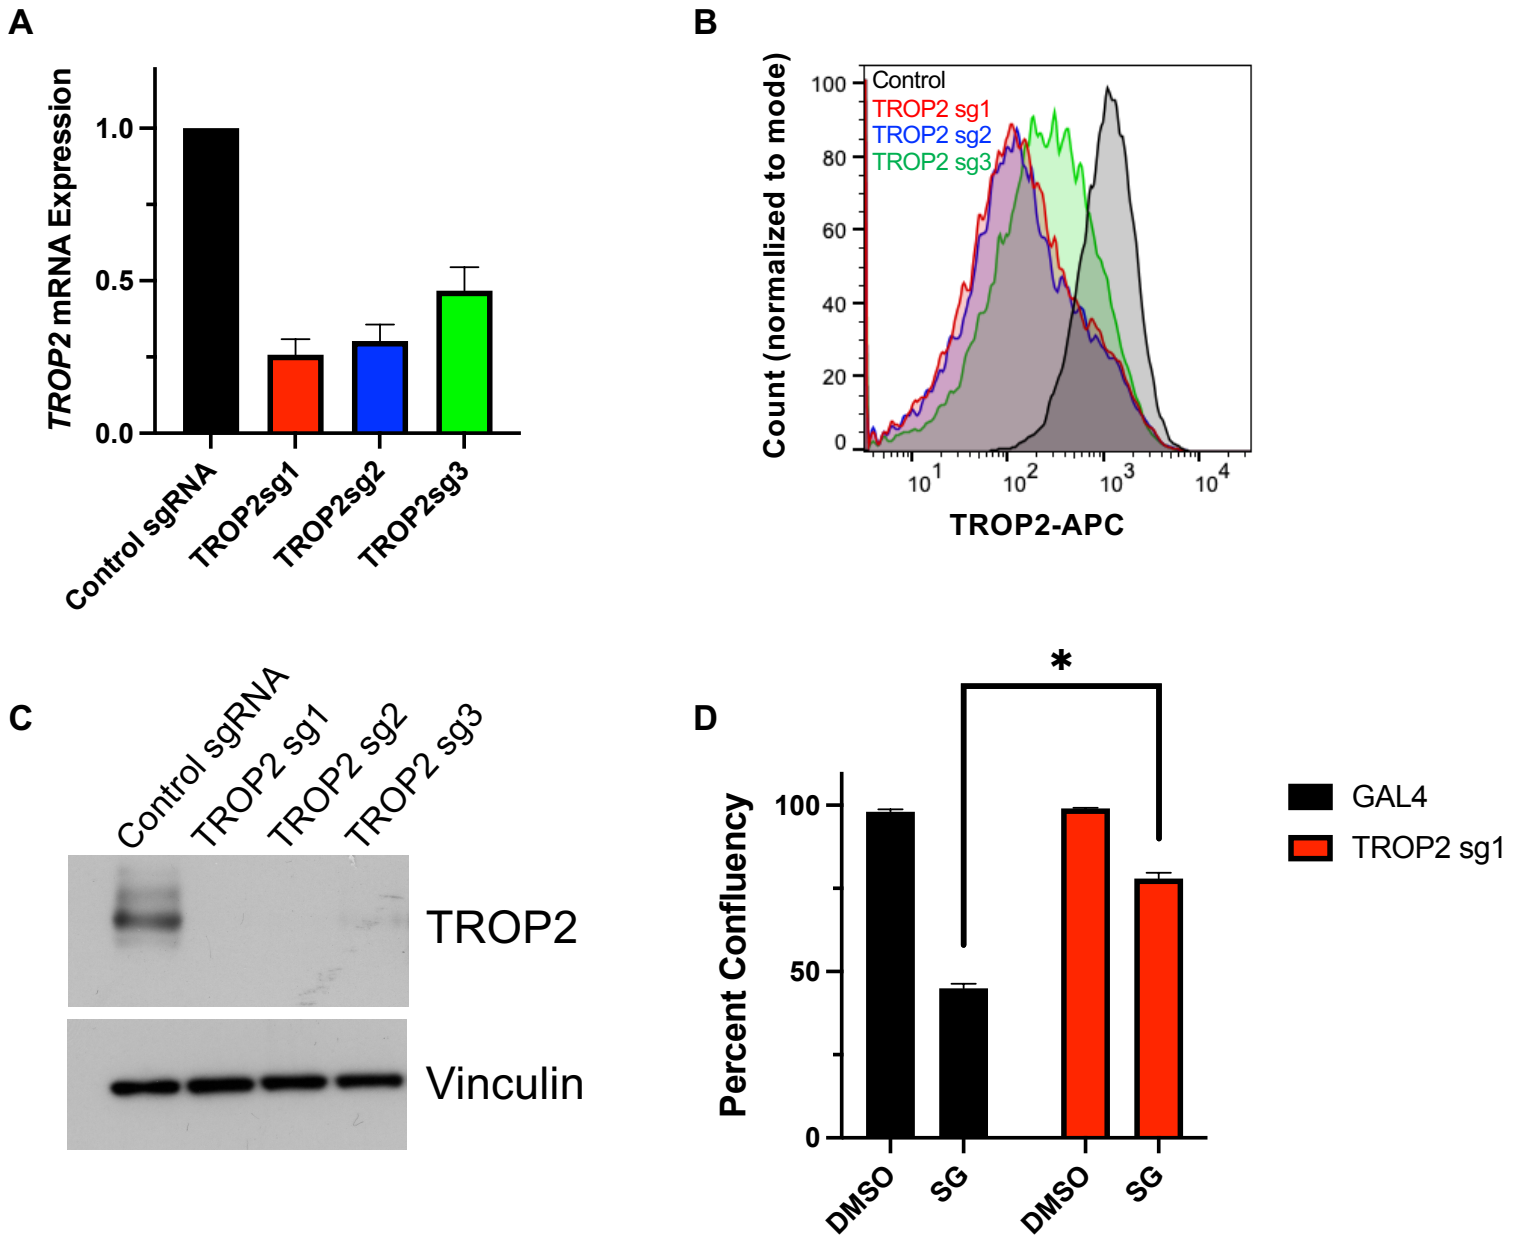

**Supplemental Figure 9: TROP2 loss leads to SG resistance.** (A) Quantitative PCR (QPCR) for *TROP2* mRNA in 647V cells expressing a Control or 3 unique sgRNAs targeting *TROP2* (sg1, sg2 and sg3). (B) Surface *TROP2* protein staining in Control and *TROP2* knockdown cells. (C) Western blot showing total *TROP2* protein in Control and *TROP2* knockdown cells. (D) Control (GAL4) or *TROP2* knockdown (sg1) cells were treated with DMSO or 30ng/ml of SG and the percent confluency on Day 7 was measured. \*  $p < 0.05$ .

# Supplemental Figure 10

A

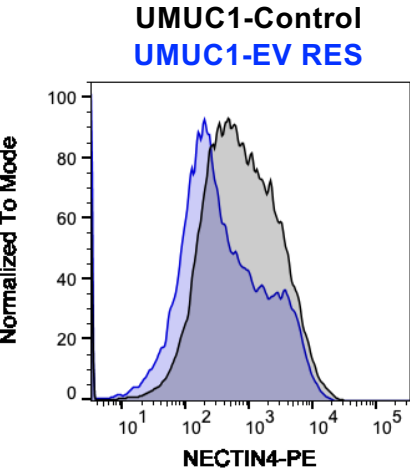

B

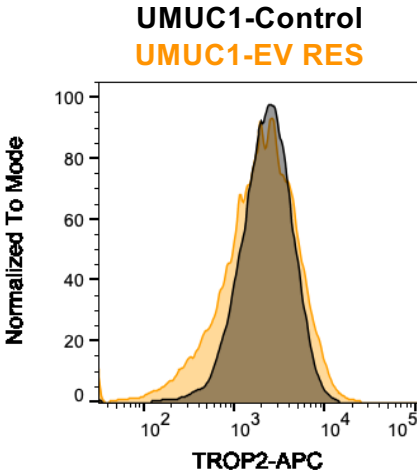

C

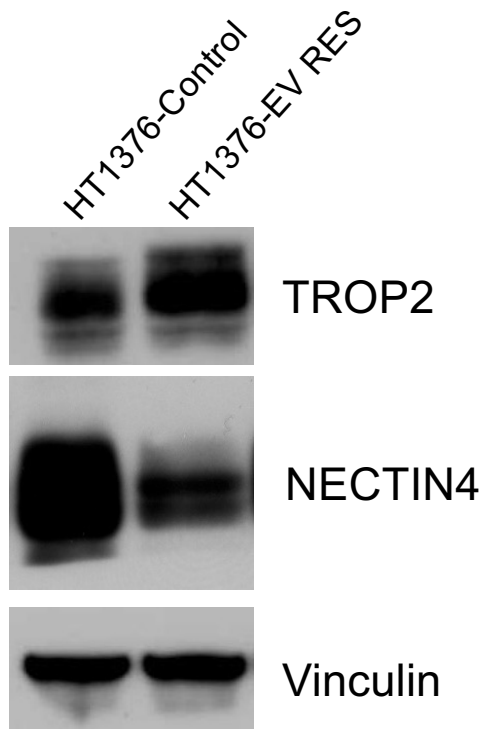

**Supplemental Figure 10: NECTIN4 and TROP2 protein levels in EV-resistant cells.** (A-B) Surface NECTIN4 (A) and TROP2 (B) protein staining in UMUC1-Control and UMUC1-EV RES cells. (C) Western blot showing total NECTIN4 and TROP2 protein in HT1376-Control and HT1376-EV RES cells.
